# Supplementary material
Source: Springer Nature journal article supplement (https://www.springermedizin.de/resource/supplementary/12874_2013_979_MOESM1_ESM.pdf/9433004)
Supplement: MOESM1 [file 9433004]

**Additional file 1 — Multivariate Cox model for FTR (N = 2206) and results of the MRS in the STR group after exclusion of the 37 STR also included in FTR, based on 507 STR (22 recipients presenting missing data for the waiting time before re-transplantation were excluded)**

|                                                      | Cox model in the FTR group |           |         | MRS in the STR group |           |         |
|------------------------------------------------------|----------------------------|-----------|---------|----------------------|-----------|---------|
|                                                      | HR                         | 95% CI    | p-value | HR                   | 95% CI    | p-value |
| <b>Variables entering in the model for FTR only</b>  |                            |           |         |                      |           |         |
| Causal nephropathy (recurrent / non recurrent)       | 1.24                       | 0.96-1.59 | 0.0987  | -                    | -         | -       |
| History of diabetes (positive / negative)            | 1.34                       | 0.96-1.85 | 0.0819  | -                    | -         | -       |
| History of hypertension (positive / negative)        | 0.77                       | 0.57-1.05 | 0.0986  | -                    | -         | -       |
| History of cardiac disease (positive / negative)     | 1.41                       | 1.11-1.79 | 0.0051  | -                    | -         | -       |
| History of vascular disease (positive / negative)    | 1.10                       | 0.81-1.51 | 0.5351  | -                    | -         | -       |
| History of dyslipemia (positive / negative)          | 1.12                       | 0.87-1.45 | 0.3828  | -                    | -         | -       |
| History of hepatitis B/C (positive / negative)       | 0.82                       | 0.45-1.47 | 0.4969  | -                    | -         | -       |
| History of malignancy (positive / negative)          | 1.25                       | 0.84-1.86 | 0.2698  | -                    | -         | -       |
| Body mass index ( $\geq 30$ kg.m-2 / $< 30$ kg.m-2)  | 1.58                       | 1.12-2.14 | 0.0084  | -                    | -         | -       |
| Anti-class I PRA (positive / negative)               | 1.45                       | 1.07-1.97 | 0.0182  | -                    | -         | -       |
| Anti-class II PRA (positive / negative)              | 1.09                       | 0.78-1.52 | 0.6299  | -                    | -         | -       |
| Donor status (deceased/living)                       | 2.50                       | 1.41-4.43 | 0.0016  | -                    | -         | -       |
| Donor EBV serology (positive / negative)             | 1.65                       | 0.98-2.78 | 0.0606  | -                    | -         | -       |
| Number of HLA-A-B-DR mismatches ( $> 4$ / $\leq 4$ ) | 1.30                       | 0.97-1.76 | 0.0824  | -                    | -         | -       |
| Induction therapy (depleting / non depleting)        | 0.79                       | 0.60-1.05 | 0.1091  | -                    | -         | -       |
| Cold ischemia time ( $\geq 24$ h / $< 24$ h)         | 1.29                       | 1.01-1.66 | 0.0441  | -                    | -         | -       |
| <b>Variables entering in both models</b>             |                            |           |         |                      |           |         |
| Transplantation period ( $< 2005$ / $\geq 2005$ )    | 1.33                       | 0.97-1.82 | 0.0693  | 1.02                 | 0.63-1.67 | 0.9254  |
| Recipient gender (male / female)                     | 1.17                       | 0.91-1.51 | 0.2186  | 0.63                 | 0.41-0.95 | 0.0290  |
| Recipient age ( $\geq 55$ years / $< 55$ years)      | 1.39                       | 1.05-1.83 | 0.0204  | 1.47                 | 0.92-2.33 | 0.1032  |
| Donor age ( $\geq 55$ years / $< 55$ years)          | 1.34                       | 1.03-1.74 | 0.0313  | 0.60                 | 0.37-0.98 | 0.0416  |
| <b>Variables entering in the model for STR only</b>  |                            |           |         |                      |           |         |
| Donor gender (male / female)                         | -                          | -         | -       | 1.47                 | 0.94-2.30 | 0.0948  |
| Waiting time before regraft $\geq 3$ years           | -                          | -         | -       | 1.84                 | 1.19-2.84 | 0.0061  |

PRA, panel reactive antibody; EBV, Epstein-Barr virus; HLA, human leukocyte antigen
